# Supplementary material
Source: PubMed Central journal article supplement (PMC6346125)
Supplement: 0f39adf5b2f6389f5cc41bb4477429d7_IAI.00604-18-s0001.pdf [file 0f39adf5b2f6389f5cc41bb4477429d7_IAI.00604-18-s0001.pdf]

**Supplemental Table 1.** Bacterial strains and PCR primers used in this study.

| Target                                                                                                                                                                                                               | Primers          | Sequence                                                                                                                      | Reference        |
|----------------------------------------------------------------------------------------------------------------------------------------------------------------------------------------------------------------------|------------------|-------------------------------------------------------------------------------------------------------------------------------|------------------|
| <i>bexA</i>                                                                                                                                                                                                          | HI-1             | CGTTTGTATGATGTTGATCCAGAC                                                                                                      | (1)              |
|                                                                                                                                                                                                                      | HI-2             | TGTCCATGTCTTCAAAAATGATG                                                                                                       | (1)              |
| <i>pepN</i>                                                                                                                                                                                                          | pepN-F           | GATGGTCGCCATTGGGTGG                                                                                                           | (2)              |
|                                                                                                                                                                                                                      | pepN-R           | GATCTGCGGTTGGCGGTGTGG                                                                                                         | (2)              |
| <i>iga</i>                                                                                                                                                                                                           | iga_F            | GTTCCACCACCTGCGCCTGCTAC                                                                                                       | (3)              |
|                                                                                                                                                                                                                      | iga_R            | GTTATATTGCCCTCGTTATTCA                                                                                                        | (3)              |
| <i>fucK</i>                                                                                                                                                                                                          | fucK_F           | ACCACTTTCGGCGTGGATGG                                                                                                          | (4)              |
|                                                                                                                                                                                                                      | fucK_R           | AAGATTTCCCAGGTGCCAGA                                                                                                          | (4)              |
| <i>lic1A</i>                                                                                                                                                                                                         | lic1A_F          | AGCTAACCGAGCTTGGGTAAAA                                                                                                        | (5)              |
|                                                                                                                                                                                                                      | lic1A_R          | AAATCATTGTGGCACGGACG                                                                                                          | (5)              |
| PCR for <i>licA</i> gene mutants                                                                                                                                                                                     | JL_R2866_1107_L1 | CCACTAGTTCTAGAGCGGCTGGAGGAAAAAGGAATGGAA                                                                                       | (6)              |
|                                                                                                                                                                                                                      | JL_R2866_1107_L2 | AGGCTGCTGCTAAAAATGAT                                                                                                          | (6)              |
| Control primer <i>licA</i> gene                                                                                                                                                                                      | JL_R2866_1107_C  | TGGAGTTTGATTGATTGATTGA                                                                                                        | (6)              |
| Control primer Kan <sup>r</sup> cassette                                                                                                                                                                             | HBKanR3          | ATCCACATCGGCCAGATCGT                                                                                                          | (7)              |
| <b>Bacterial strain name</b>                                                                                                                                                                                         |                  |                                                                                                                               |                  |
|                                                                                                                                                                                                                      |                  | <b>Type</b>                                                                                                                   | <b>Reference</b> |
| RIVM_044, RIVM_045, RIVM_046, RIVM_047, RIVM_048, RIVM_049, RIVM_050, RIVM_051, RIVM_052, RIVM_054, RIVM_055, RIVM_056, RIVM_057, RIVM_058, RIVM_060, RIVM_061, RIVM_062, RIVM_063, RIVM_064, RIVM_65                |                  | Oropharyngeal swabs                                                                                                           | (8)              |
| CWZ_003, CWZ_004, CWZ_005, CWZ_006, CWZ_007, CWZ_008, CWZ_009, CWZ_012, CWZ_013, CWZ_015, CWZ_016, CWZ_017, CWZ_021, CWZ_022, CWZ_033, CWZ_036, CWZ_053, CWZ_054, Radboud_003, Radboud_004, Radboud_005, Radboud_006 |                  | Blood cultures                                                                                                                | This study       |
| R2866Δ <i>licA</i> / <i>galE</i>                                                                                                                                                                                     |                  | R2866 with <i>licA</i> gene replaced by Kan <sup>r</sup> cassette and <i>galE</i> gene replaced by Spec <sup>r</sup> cassette | (6)              |
| CWZ_012Δ <i>licA</i>                                                                                                                                                                                                 |                  | CWZ_012 with <i>licA</i> gene replaced by Kan <sup>r</sup> cassette                                                           | This study       |
| CWZ_016Δ <i>licA</i>                                                                                                                                                                                                 |                  | CWZ_016 with <i>licA</i> gene replaced by Kan <sup>r</sup> cassette                                                           | This study       |

**References**

1. **Falla TJ, Crook DW, Brophy LN, Maskell D, Kroll JS, Moxon ER.** 1994. PCR for capsular typing of *Haemophilus influenzae*. *J Clin Microbiol* **32**:2382-2386.
2. **Ecevit IZ, McCrea KW, Pettigrew MM, Sen A, Marrs CF, Gilsdorf JR.** 2004. Prevalence of the *hifBC*, *hmw1A*, *hmw2A*, *hmwC*, and *hia* Genes in *Haemophilus influenzae* Isolates. *J Clin Microbiol* **42**:3065-3072.
3. **Vitovski S, Dunkin KT, Howard AJ, Sayers JR.** 2002. Nontypeable *Haemophilus influenzae* in carriage and disease: a difference in IgA1 protease activity levels. *JAMA* **287**:1699-1705.
4. **Meats E, Feil EJ, Stringer S, Cody AJ, Goldstein R, Kroll JS, Popovic T, Spratt BG.** 2003. Characterization of encapsulated and nonencapsulated *Haemophilus influenzae* and determination of phylogenetic relationships by multilocus sequence typing. *J Clin Microbiol* **41**:1623-1636.

5. **Clark SE, Eichelberger KR, Weiser JN.** 2013. Evasion of killing by human antibody and complement through multiple variations in the surface oligosaccharide of *Haemophilus influenzae*. *Mol Microbiol* **88**:603-618.
6. **Langereis JD, de Jonge MI, Weiser JN.** 2014. Binding of human factor H to outer membrane protein P5 of non-typeable *Haemophilus influenzae* contributes to complement resistance. *Mol Microbiol* **94**:89-106.
7. **Langereis JD, Stol K, Schweda EK, Twelkmeyer B, Bootsma HJ, de Vries SP, Burghout P, Diavatopoulos DA, Hermans PW.** 2012. Modified lipooligosaccharide structure protects nontypeable *Haemophilus influenzae* from IgM-mediated complement killing in experimental otitis media. *MBio* **3**:e00079-00012.
8. **van Beek J, Veenhoven RH, Bruin JP, van Boxtel RAJ, de Lange MMA, Meijer A, Sanders EAM, Rots NY, Luytjes W.** 2017. Influenza-like Illness Incidence Is Not Reduced by Influenza Vaccination in a Cohort of Older Adults, Despite Effectively Reducing Laboratory-Confirmed Influenza Virus Infections. *J Infect Dis* **216**:415-424.

**Supplemental Table 2. Patient characteristics.**

| Strain name  | Type               | Collection year | Age | Gender | Acute presentation                                    | Malignancy                  | Other disease or treatment                                                                  |
|--------------|--------------------|-----------------|-----|--------|-------------------------------------------------------|-----------------------------|---------------------------------------------------------------------------------------------|
| RIVM_044     | Oropharyngeal swab | 2012            | 73  | M      |                                                       |                             |                                                                                             |
| RIVM_045     | Oropharyngeal swab | 2012            | 66  | F      |                                                       |                             |                                                                                             |
| RIVM_046     | Oropharyngeal swab | 2012            | 77  | M      |                                                       |                             | Pneumocystis                                                                                |
| RIVM_047     | Oropharyngeal swab | 2012            | 68  | M      |                                                       |                             | Cardio-vascular disease (heart attack 2010)                                                 |
| RIVM_048     | Oropharyngeal swab | 2012            | 76  | F      |                                                       |                             | Cardio-vascular disease (stent placement 2006), asthma, glaucoma & macular degeneration     |
| RIVM_049     | Oropharyngeal swab | 2013            | 71  | F      |                                                       |                             | Arthritis, dizziness                                                                        |
| RIVM_050     | Oropharyngeal swab | 2012            | 73  | F      |                                                       |                             |                                                                                             |
| RIVM_051     | Oropharyngeal swab | 2013            | 62  | F      |                                                       |                             |                                                                                             |
| RIVM_052     | Oropharyngeal swab | 2012            | 61  | F      |                                                       |                             |                                                                                             |
| RIVM_054     | Oropharyngeal swab | 2013            | 70  | M      |                                                       |                             | Previous airway infection (November 2012)                                                   |
| RIVM_055     | Oropharyngeal swab | 2012            | 73  | M      |                                                       |                             | High cholesterol                                                                            |
| RIVM_056     | Oropharyngeal swab | 2013            | 75  | F      |                                                       |                             | Breathlessness, possibly lung emphysema                                                     |
| RIVM_057     | Oropharyngeal swab | 2012            | 85  | F      |                                                       |                             | Hypertension, previous breast cancer, current skin cancer                                   |
| RIVM_058     | Oropharyngeal swab | 2012            | 72  | F      |                                                       |                             | COPD                                                                                        |
| RIVM_060     | Oropharyngeal swab | 2012            | 63  | M      |                                                       |                             |                                                                                             |
| RIVM_061     | Oropharyngeal swab | 2012            | 72  | M      |                                                       |                             | Chronic sinusitis, polyps removed from intestine                                            |
| RIVM_062     | Oropharyngeal swab | 2012            | 78  | F      |                                                       |                             | Diabetes type 2                                                                             |
| RIVM_063     | Oropharyngeal swab | 2013            | 85  | F      |                                                       |                             |                                                                                             |
| RIVM_064     | Oropharyngeal swab | 2012            | 69  | M      |                                                       |                             |                                                                                             |
| RIVM_065     | Oropharyngeal swab | 2012            | 67  | F      | Pneumonia                                             |                             | Cardio-vascular disease                                                                     |
| CWZ_003      | Blood culture      | 2009            | 75  | F      | Pneumonia                                             |                             | Cardio-vascular disease                                                                     |
| CWZ_004      | Blood culture      | 2010            | 81  | M      | Pneumonia                                             |                             | Cardio-vascular disease                                                                     |
| CWZ_005      | Blood culture      | 2011            | 71  | M      |                                                       | Colon carcinoma             | Co-infection with <i>Streptococcus pneumoniae</i> , metastases in spleen, liver and lungs   |
| CWZ_006      | Blood culture      | 2009            | 62  | M      | Fever                                                 | Colon and bladder carcinoma | Chemotherapy                                                                                |
| CWZ_007      | Blood culture      | 2009            | 66  | M      | Pneumonia                                             |                             |                                                                                             |
| CWZ_008      | Blood culture      | 2010            | 79  | M      | Pneumonia                                             |                             | COPD                                                                                        |
| CWZ_009      | Blood culture      | 2009            | 70  | M      | Sepsis                                                |                             | Diabetes, cholangitis, co-infection with <i>Escherichia coli</i>                            |
| CWZ_012      | Blood culture      | 2013            | 67  | F      | Pneumonia/sepsis                                      |                             | Liver disease, dilated bile ducts                                                           |
| CWZ_013      | Blood culture      | 2014            | 69  | F      | Stent placement                                       |                             | Cholecystitis, and liver disease, co-infection with <i>Fusobacterium nucleatum</i>          |
| CWZ_015      | Blood culture      | 2012            | 55  | M      | Sepsis                                                |                             | COPD                                                                                        |
| CWZ_016      | Blood culture      | 2012            | 71  | M      | Sepsis/meningitis                                     |                             | COPD                                                                                        |
| CWZ_017      | Blood culture      | 2012            | 66  | F      | Exacerbation COPD, sepsis                             |                             | COPD                                                                                        |
| CWZ_021      | Blood culture      | 2012            | 77  | M      |                                                       |                             | COPD                                                                                        |
| CWZ_022      | Blood culture      | 2013            | 63  | M      | Sepsis/meningitis                                     |                             |                                                                                             |
| CWZ_033      | Blood culture      | 2016            | 73  | F      | Sepsis after hip surgery                              |                             | Co-infection with <i>Pseudomonas aeruginosa</i> and <i>Staphylococcus aureus</i>            |
| CWZ_036      | Blood culture      | 2016            | 73  | M      |                                                       | Non-Hodgkin B cell lymphoma | Cardiovascular disease, chemotherapy. Last chemotherapy 10 days prior to hospital admission |
| CWZ_053      | Blood culture      | 2017            | 73  | F      | Meningo-encephalitis after acute otitis media         | Non-Hodgkin B cell lymphoma |                                                                                             |
| CWZ_054      | Blood culture      | 2017            | 86  | M      | Pneumonia/sepsis                                      | Adenocarcinoma lung         |                                                                                             |
| Radbound_003 | Blood culture      | 2015            | 57  | F      | Influenza B virus + <i>H. influenzae</i> co-infection | Acute lymphocytic leukemia  | COPD, latent <i>Mycobacterium tuberculosis</i>                                              |
| Radbound_004 | Blood culture      | 2015            | 66  | F      |                                                       | Multiple myeloma            | Oesophagus carcinoma                                                                        |
| Radbound_005 | Blood culture      | 2015            | 66  | F      | Fasciitis necroticans                                 |                             | Systemic Lupus Erythematosus                                                                |
| Radbound_006 | Blood culture      | 2017            | 67  | M      | Viral + <i>Haemophilus influenzae</i> co-infection    | Plasma cell leukemia        |                                                                                             |

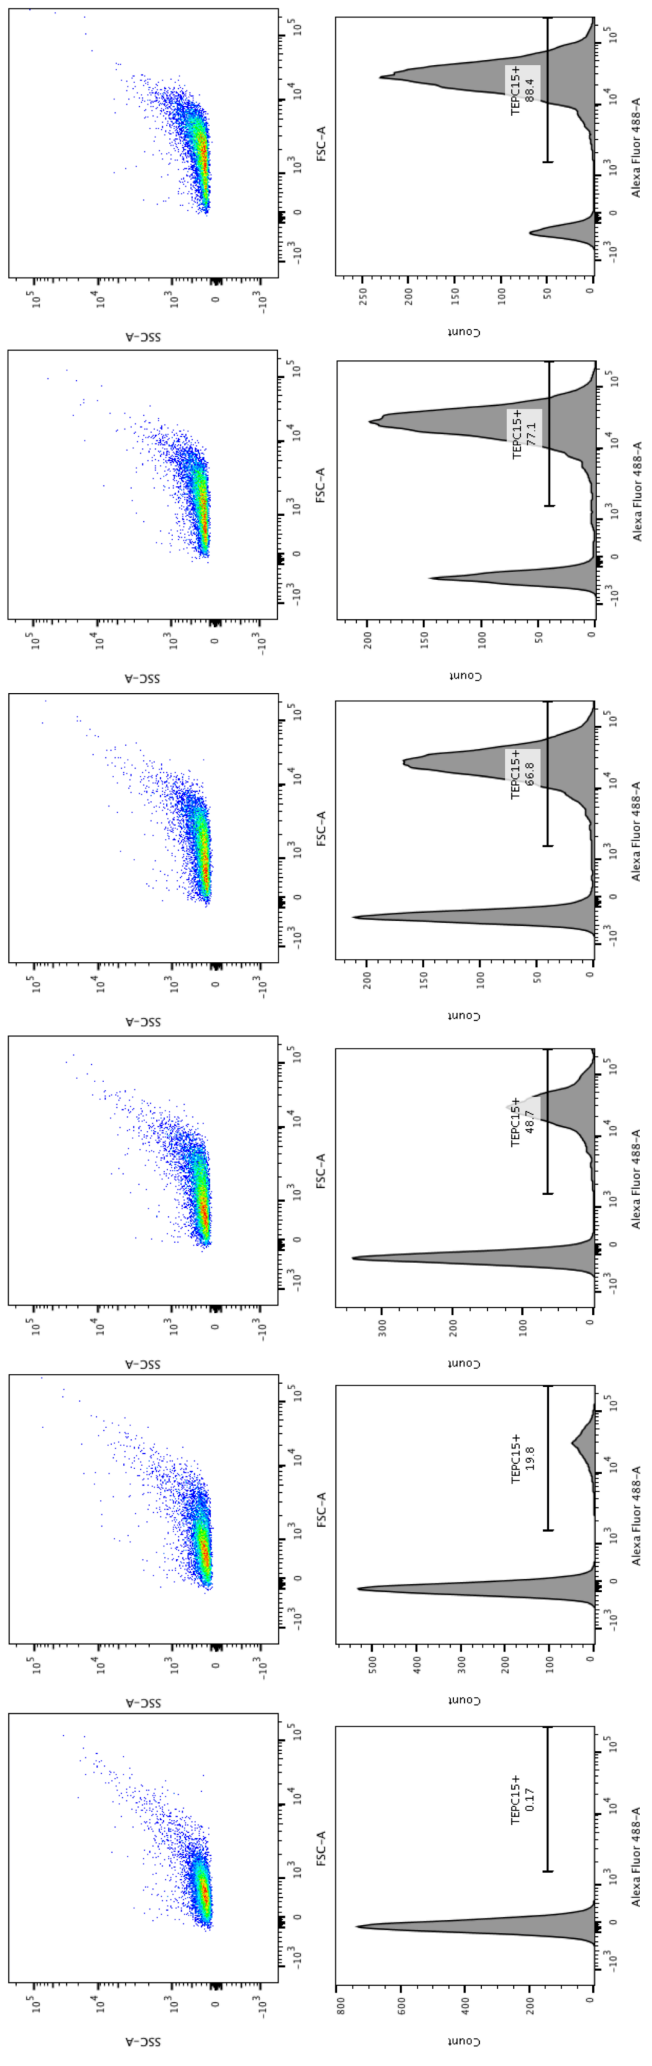

**Supplemental figure 1.** PCho expression as determined by TEPC-15 flow cytometry. Strain H446 (PCho-) and strain H457 (PCho+) were mixed and PCho expression was determined by flow cytometry.
